# Supplementary material for: COPI mediates recycling of an exocytic SNARE by recognition of a ubiquitin sorting signal
Source: eLife. 2017 Oct 23;6:e28342. doi: 10.7554/eLife.28342 (PMC5663479; doi:10.7554/eLife.28342)
Supplement: Figure 1—source data 1. — Statistical analysis data used to compare the significant difference has been included. [file elife-28342-fig1-data1.xlsx]

## Sheet: Figure 1 Source data
Xu et.al. COPI mediates recycling of an exocytic SNARE by recognition of a ubiquitin sorting signal
Figure 1 Source data 1
Fig1B							Fig1D							Fig1F
Quantification and Statistical analysis of GFP-Snc1 in plasma membrane							Quantification and Statistical analysis of GFP-Snc1 localized with mCherry-Tlg1							Quantification and Statistical analysis of GFP-Snc1 in plasma membrane
for Snc1 WT, Snc1 rcy1Δ,DUB-Snc1, DUB*-Snc1,Snc1 PM and DUB-Snc1 PM							by Pearson correlation coefficient (PCC) for Snc1, DUB-Snc1, DUB*-Snc1 and DUB-Snc1-PM							for WT, drs2∆,drs2∆ Drs2-DUB,drs2∆ Drs2-DUB*
Snc1 WT	rcy1Δ	DUB-Snc1	DUB*-Snc1	Snc1 PM	DUB-Snc1 PM		Snc1	DUB-Snc1	DUB*-Snc1	DUB-Snc1-PM				DRS2 WT	drs2	drs2 Drs2-DUB	drs2 Drs2-DUB*
49.9561	25.5646	24.7501	47.4822	49.0974	48.7525		0.07305	0.43545	0.10105	-0.0815				42.85	24.17	40.98	45.35
44.0113	28.4025	29.3085	48.7529	44.0765	47.7016		0.0759	0.5219	0.10385	-0.0297				42.48	24.85	44.6	41.07
51.3521	24.6259	33.4845	45.0031	45.8638	44.6		0.18535	0.4377	0.108	-0.1				46.5	25.496	45	44.03
Tukey's multiple comparisons test	Mean Diff.	95% CI of diff.	Significant?	Summary	Adjusted P Value		Tukey's multiple comparisons test	Mean Diff.	95% CI of diff.	Significant?	Summary	Adjusted P Value		Tukey's multiple comparisons test	Mean Diff.	95% CI of diff.	Significant?	Summary	Adjusted P Value
Snc1 WT vs. Snc1 rcy1Δ	22.24	14.10 to 30.39	Yes	****	< 0.0001		Snc1 vs. DUB*-Snc1	0.007133	-0.1088 to 0.1231	No	ns	0.9971		DRS2 WT vs. drs2	19.1	14.03 to 24.18	Yes	****	< 0.0001
Snc1 WT vs. DUB*-Snc1	1.36	-6.785 to 9.506	No	ns	0.9919		DUB-Snc1 vs. DUB*-Snc1	0.3607	0.2448 to 0.4767	Yes	****	< 0.0001		DRS2 WT vs. drs2 Drs2-DUB	0.4167	-4.661 to 5.494	No	ns	0.9931
DUB-Snc1 vs. DUB*-Snc1	-17.9	-26.04 to -9.753	Yes	****	< 0.0001									drs2 Drs2-DUB vs. drs2 Drs2-DUB*	0.04333	-5.034 to 5.121	No	ns	> 0.9999
Snc1 PM vs. DUB-Snc1 PM	-0.6722	-8.817 to 7.473	No	ns	0.9997
