# Supplementary material for: COPI mediates recycling of an exocytic SNARE by recognition of a ubiquitin sorting signal
Source: eLife. 2017 Oct 23;6:e28342. doi: 10.7554/eLife.28342 (PMC5663479; doi:10.7554/eLife.28342)
Supplement: Figure 2—source data 1. — Statistical analysis data used to determine significant differences has been included. [file elife-28342-fig2-data1.xlsx]

## Sheet: Figure2 Source data
Xu et.al. COPI mediates recycling of an exocytic SNARE by recognition of a ubiquitin sorting signal
Figure 2 Source data 1
Fig 2D								Fig 2H
Quantification and Statistical analysis of GFP-Snc1 in plasma membrane								Quantification and Statistical analysis of GFP-Snc1 in plasma membrane
for WT,rcy1Δ,DUB-RCY1, DUB*-RCY1								for WT,pib1Δ,tul1Δ,pib1Δtul1Δ
WT	rcy1	DUB-RCY1	DUB*-RCY1					WT	pib1	tul1	pib1tul1
53.97	24.18	38.7	37.52					54.7667	59.3222	56.4308	38.7455
55	23.35	44.29	33.34					59.3412	58.6278	56.9515	32.3597
54.53	18.82	29.76	34.69					61.8417	63.3014	56.5492	44.8261
Tukey's multiple comparisons test	Mean Diff.	95% CI of diff.	Significant?	Summary	Adjusted P Value			Tukey's multiple comparisons test	Mean Diff.	95% CI of diff.	Significant?	Summary	Adjusted P Value
WT vs. rcy1	32.38	21.69 to 43.07	Yes	****	< 0.0001			WT vs. pib1	-1.767	-11.74 to 8.204	No	ns	0.939
DUB-RCY1 vs. DUB*-RCY1	2.4	-8.290 to 13.09	No	ns	0.8869			WT vs. tul1	2.006	-7.965 to 11.98	No	ns	0.9146
								WT vs. pib1tul1	20.01	10.04 to 29.98	Yes	***	0.0009
								pib1 vs. tul1	3.773	-6.198 to 13.74	No	ns	0.637
								pib1 vs. pib1tul1	21.77	11.80 to 31.74	Yes	***	0.0005
								tul1 vs. pib1tul1	18	8.029 to 27.97	Yes	**	0.0019
