# Supplementary material for: COPI mediates recycling of an exocytic SNARE by recognition of a ubiquitin sorting signal
Source: eLife. 2017 Oct 23;6:e28342. doi: 10.7554/eLife.28342 (PMC5663479; doi:10.7554/eLife.28342)
Supplement: Figure 4—source data 1. — Statistical analysis data used to determine significant differences has been included. [file elife-28342-fig4-data1.xlsx]

## Sheet: Figure4 Source data
Xu et.al. COPI mediates recycling of an exocytic SNARE by recognition of a ubiquitin sorting signal
Figure 4 Source data 1
Fig 4C										Fig 4D
Quantification and Statistical analysis of GFP-Snc1 in plasma membrane										Quantification and Statistical analysis of GFP-Snc1 localized with mCherry-Tlg1
for β'-COP WT,RKR,∆2-304,human β-Propeller,UBADoa1,NZFTab2,UBAMud1 and WT α-COP,∆2-304										by Pearson correlation coefficient (PCC) for β'-COP WT,RKR,∆2-304,UBADoa1
β'-COP							α-COP			β'-COP WT	β'-COP RKR	β'-COP Δ2-304	β'-COP UBD
WT	RKR	∆2-304	human β-Propeller	UBD	NZF	UBA	WT	∆2-324		0.5245	0.433	0.6879	0.54285
42.6232	41.0792	24.0471	46.4248	41.0644	53.953	25.7496	45.4974	31.639		0.55985	0.45225	0.6244	0.4464
44.9863	48.1629	23.4967	46.8424	43.5742	57.6616	25.0587	42.6347	32.8766		0.433	0.43855	0.76685	0.52125
49.7668	46.6173	28.1259	51.7338	48.8411	49.7681	23.9418	48.4122	31.0459
Tukey's multiple comparisons test	Mean Diff.	95% CI of diff.	Significant?	Summary	Adjusted P Value					Dunnett's multiple comparisons test	Mean Diff.	95% CI of diff.	Significant?	Summary	Adjusted P Value
β'-COP WT vs. β'-COP RKR	0.5056	-8.215 to 9.226	No	ns	> 0.9999					β'-COP WT vs. β'-COP RKR	0.06452	-0.06448 to 0.1935	No	ns	0.3914
β'-COP WT vs. β'-COP ∆2-304	20.57	11.85 to 29.29	Yes	****	< 0.0001					β'-COP WT vs. β'-COP Δ2-304	-0.1873	-0.3163 to -0.05827	Yes	**	0.0079
β'-COP WT vs. β'-COP human β-Propeller	-2.542	-11.26 to 6.179	No	ns	0.9785					β'-COP WT vs. β'-COP UBD	0.002283	-0.1267 to 0.1313	No	ns	> 0.9999
β'-COP WT vs. β'-COP UBD	1.299	-7.422 to 10.02	No	ns	0.9998
β'-COP WT vs. β'-COP NZF	-8.002	-16.72 to 0.7185	No	ns	0.0869
β'-COP ∆2-304 vs. β'-COP UBA	0.3065	-8.414 to 9.027	No	ns	> 0.9999
β'-COP human β-Propeller vs. β'-COP UBD	3.84	-4.880 to 12.56	No	ns	0.8215
β'-COP human β-Propeller vs. β'-COP NZF	-5.461	-14.18 to 3.260	No	ns	0.4482
β'-COP UBD vs. β'-COP NZF	-9.301	-18.02 to -0.5804	Yes	*	0.0315
β-COP WT vs. β-COP ∆2-324	13.66	4.940 to 22.38	Yes	***	0.0009
