# Supplementary material for: COPI mediates recycling of an exocytic SNARE by recognition of a ubiquitin sorting signal
Source: eLife. 2017 Oct 23;6:e28342. doi: 10.7554/eLife.28342 (PMC5663479; doi:10.7554/eLife.28342)
Supplement: Figure 5—source data 1. — Statistical analysis data used to determine significant differences has been included. [file elife-28342-fig5-data1.xlsx]

## Sheet: Figure 5 Source data 1
Xu et.al. COPI mediates recycling of an exocytic SNARE by recognition of a ubiquitin sorting signal
Figure 5 Source data 1
Fig 5B
Quantification and Statistical analysis of GFP-Rer1 in the vacuole
for β'-COP WT,RKR,∆2-304,UBADoa1 and α-COP ts allele(ret1-1) at 26 ̊C or 37 ̊C
β'-COP				ret1-1
WT	RKR	Δ2-304	UBD	26 ̊C	37 ̊C
15.6844	14.4481	12.4703	13.1892	40.4602	44.8288
14.8886	13.2276	29.3099	9.67978	39.3644	28.198
20.9583	9.49809	19.3009	21.0854	38.795	26.8835
13.0473	10.7538	22.7326	11.1149	44.9774	42.5887
27.152	15.1675	9.24592	20.2588	30.9881	35.0375
13.5932	24.554	18.7263	19.2707	56.6453	58.3821
8.99917	13.1438	22.7126	13.6228	25.3843	32.5357
16.1788	8.22409	23.554	25.3829	30.737	72.3351
13.3654	18.1773	20.9214	21.3349	28.7705	34.8621
25.1623	10.7545	4.73308	21.6634	22.2166	47.7413
13.2936	19.6146	9.38985	17.903	35.3845	56.415
17.9274	25	21.5799	17.8297	46.1753	34.1209
16.4697	14.9722	20.4791	20.2441	32.032	53.9186
13.8958	20.1316	21.5368	20.9456	32.1962	62.2236
18.8353	19.8992	23.8292	23.6847	28.2887	46.6494
18.3381	21.3967	31.5386	18.1741	60.5935	45.9592
12.3267	26.7608	31.9238	22.7825	25.3258	50.0982
15.4004	18.7872	27.9655	25.6941	35.8256	57.3073
7.94558	39.9286	37.4035	17.1596	25.9276	50.6245
22.9741	13.4219	24.0783	19.2984	21.9034	59.7836
Tukey's multiple comparisons test	Mean Diff.	95% CI of diff.	Significant?	Summary	Adjusted P Value
β'-COP WT vs. β'-COP RKR	-1.571	-9.324 to 6.182	No	ns	0.9917
β'-COP WT vs. β'-COP Δ2-304	-5.35	-13.10 to 2.403	No	ns	0.3487
β'-COP WT vs. β'-COP UBD	-2.694	-10.45 to 5.059	No	ns	0.9146
β'-COP WT vs. ret1-1 26 ̊C	-18.78	-26.53 to -11.02	Yes	****	< 0.0001
β'-COP WT vs. ret1-1 37 ̊C	-30.7	-38.46 to -22.95	Yes	****	< 0.0001
β'-COP RKR vs. β'-COP Δ2-304	-3.779	-11.53 to 3.974	No	ns	0.7193
β'-COP RKR vs. β'-COP UBD	-1.123	-8.876 to 6.630	No	ns	0.9983
β'-COP RKR vs. ret1-1 26 ̊C	-17.21	-24.96 to -9.454	Yes	****	< 0.0001
β'-COP RKR vs. ret1-1 37 ̊C	-29.13	-36.88 to -21.38	Yes	****	< 0.0001
β'-COP Δ2-304 vs. β'-COP UBD	2.656	-5.097 to 10.41	No	ns	0.9193
β'-COP Δ2-304 vs. ret1-1 26 ̊C	-13.43	-21.18 to -5.675	Yes	****	< 0.0001
β'-COP Δ2-304 vs. ret1-1 37 ̊C	-25.35	-33.11 to -17.60	Yes	****	< 0.0001
β'-COP UBD vs. ret1-1 26 ̊C	-16.08	-23.84 to -8.331	Yes	****	< 0.0001
β'-COP UBD vs. ret1-1 37 ̊C	-28.01	-35.76 to -20.26	Yes	****	< 0.0001
ret1-1 26 ̊C vs. ret1-1 37 ̊C	-11.93	-19.68 to -4.172	Yes	***	0.0003
