# Supplementary material for: COPI mediates recycling of an exocytic SNARE by recognition of a ubiquitin sorting signal
Source: eLife. 2017 Oct 23;6:e28342. doi: 10.7554/eLife.28342 (PMC5663479; doi:10.7554/eLife.28342)
Supplement: Figure 6—source data 1. — Statistical analysis data used to determine significant differences has been included. [file elife-28342-fig6-data1.xlsx]

## Sheet: Figure6 Source data
Xu et.al. COPI mediates recycling of an exocytic SNARE by recognition of a ubiquitin sorting signal
Figure 6 Source data 1
Fig 6B
Quantification and Statistical analysis of Cop1 with Rer1, Tlg1 or Sec7 and Tlg1 with Rer1.
Cop1I/Tlg1	Cop1/Sec7	Cop1/Rer1	Tlg1/Rer1
14.78	2.22	54.46	1.96078
21.95	3.96	62.58	1.85185
18.58	1.12	66.98	2.43902
Tukey's multiple comparisons test	Mean Diff.	95% CI of diff.	Significant?	Summary	Adjusted P Value
COPI/Tlg1 vs. Tlg1/Rer1	16.35	6.626 to 26.08	Yes	**	0.0029
COPI/Tlg1 vs. COPI/Sec7	16	6.276 to 25.73	Yes	**	0.0033
