# Supplementary figures and images for: COPI mediates recycling of an exocytic SNARE by recognition of a ubiquitin sorting signal
Source: eLife journal article supplement (doi:10.7554/elife.28342), 2017-10-23

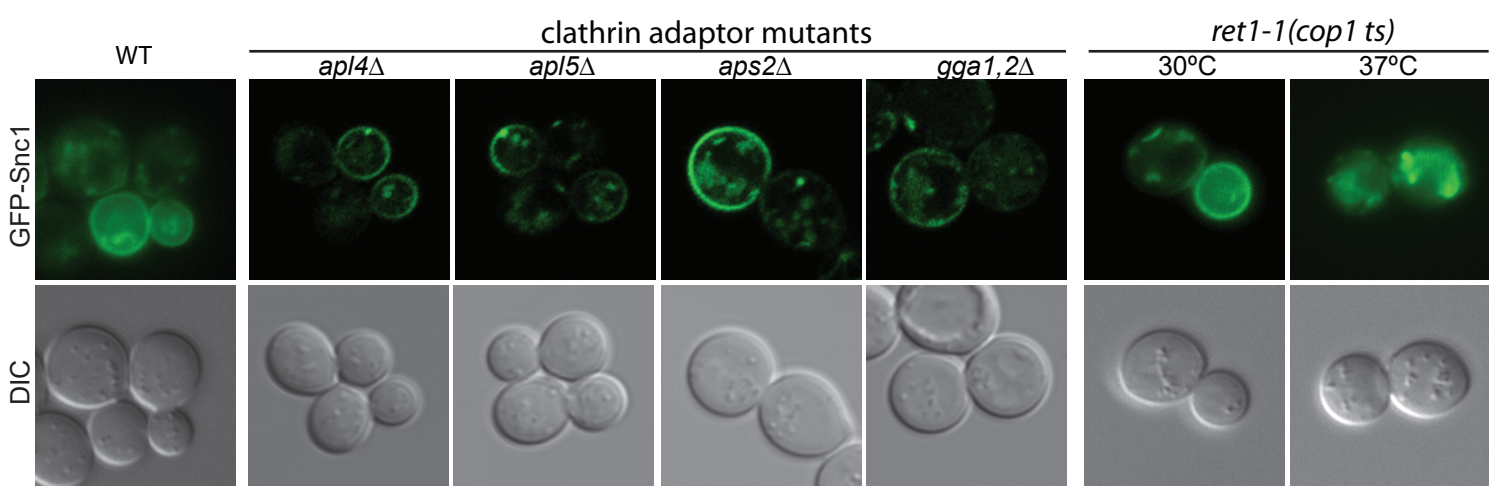

Supplement: supp [file elife_poa_e28342_Figure_2_figure_supplement_1.pdf › elife_poa_e28342_Figure_2_figure_supplement_1.pdf]

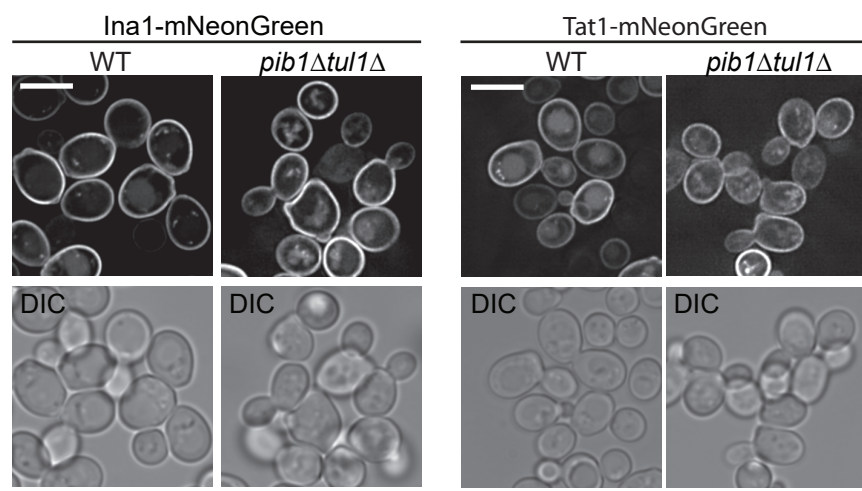

Supplement: supp [file elife_poa_e28342_Figure_2_figure_supplement_2.pdf › elife_poa_e28342_Figure_2_figure_supplement_2.pdf]

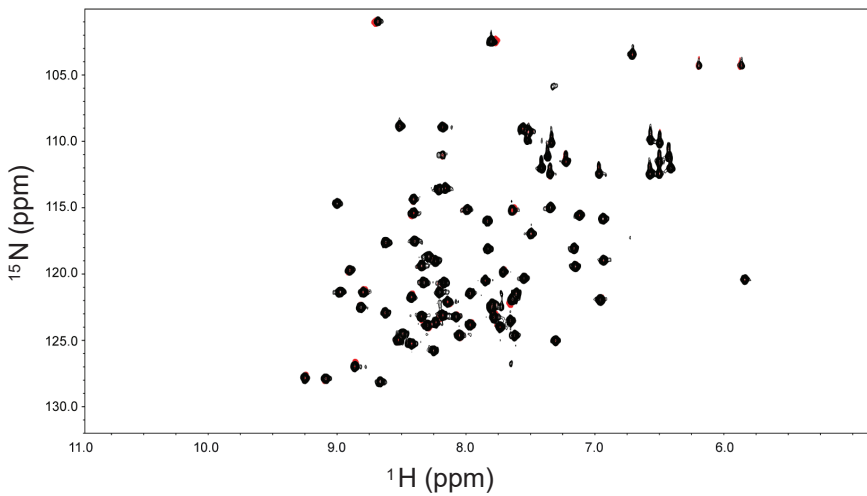

Supplement: supp [file elife_poa_e28342_Figure_3_figure_supplement_1.pdf › elife_poa_e28342_Figure_3_figure_supplement_1.pdf]

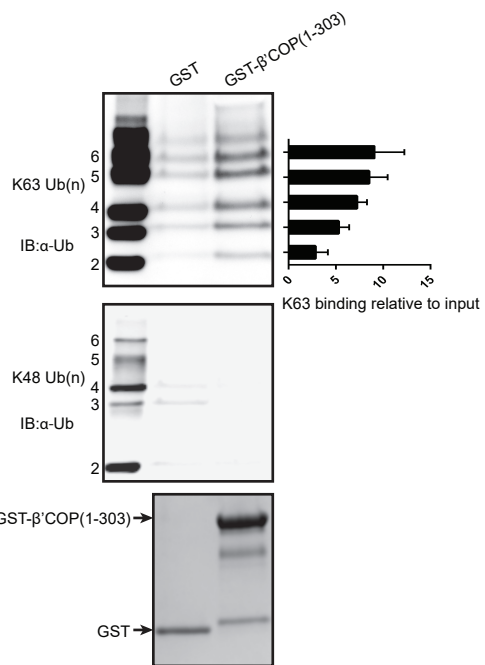

Supplement: supp [file elife_poa_e28342_Figure_4_figure_supplement_1.pdf › elife_poa_e28342_Figure_4_figure_supplement_1.pdf]
